# Supplementary material for: The Importance of Demonstratively Restoring Order
Source: PLoS One. 2013 Jun 5;8(6):e65137. doi: 10.1371/journal.pone.0065137 (PMC3673976; doi:10.1371/journal.pone.0065137)
Supplement: Data S1 — Dataset and description of Study 1. (PDF) [file pone.0065137.s001.pdf]

Prosoc:        0 = No action (Letter is not posted)  
                  1 = Prosocial action (Letter is posted)

[illegible]

[illegible]

[illegible]

[illegible]

[illegible]

[illegible]
