# Supplementary material for: The Importance of Demonstratively Restoring Order
Source: PLoS One. 2013 Jun 5;8(6):e65137. doi: 10.1371/journal.pone.0065137 (PMC3673976; doi:10.1371/journal.pone.0065137)
Supplement: Data S2 — Dataset and description of Study 2. (PDF) [file pone.0065137.s002.pdf]

Prosoc: 0 = No action (Bicycle is not picked-up)  
1 = Prosocial action (Bicycle is picked-up)

[illegible]

[illegible]

[illegible]

|   |   |   |   |   |
|---|---|---|---|---|
| 2 | 1 | 0 | 0 | 0 |
| 2 | 1 | 0 | 0 | 0 |
| 2 | 1 | 0 | 0 | 0 |
| 2 | 1 | 0 | 0 | 0 |
| 2 | 1 | 0 | 0 | 0 |
| 2 | 1 | 0 | 0 | 0 |
| 2 | 1 | 0 | 0 | 0 |
| 2 | 1 | 0 | 0 | 0 |
| 2 | 1 | 0 | 0 | 0 |
| 2 | 1 | 0 | 0 | 0 |
| 2 | 1 | 0 | 0 | 0 |
| 2 | 1 | 0 | 0 | 0 |
| 2 | 1 | 0 | 0 | 1 |
| 2 | 1 | 0 | 0 | 1 |
| 2 | 1 | 0 | 0 | 1 |
| 2 | 1 | 0 | 0 | 1 |
| 2 | 1 | 0 | 0 | 1 |
| 2 | 1 | 0 | 0 | 1 |
| 2 | 1 | 0 | 0 | 1 |
| 2 | 1 | 0 | 0 | 1 |
| 2 | 1 | 0 | 0 | 1 |
| 2 | 1 | 0 | 0 | 1 |
| 2 | 1 | 0 | 0 | 1 |
| 2 | 1 | 0 | 0 | 1 |
| 2 | 1 | 0 | 0 | 1 |
| 2 | 2 | 0 | 0 | 0 |
| 2 | 2 | 0 | 0 | 0 |
| 2 | 2 | 0 | 0 | 0 |
| 2 | 2 | 0 | 0 | 0 |
| 2 | 2 | 0 | 0 | 0 |
| 2 | 2 | 0 | 0 | 0 |
| 2 | 2 | 0 | 0 | 1 |
| 2 | 3 | 1 | 1 | 0 |
| 2 | 3 | 1 | 1 | 0 |
| 2 | 3 | 1 | 1 | 0 |
| 2 | 3 | 1 | 1 | 0 |
| 2 | 3 | 1 | 1 | 0 |
| 2 | 3 | 1 | 1 | 0 |
| 2 | 3 | 1 | 1 | 0 |
| 2 | 3 | 1 | 1 | 0 |
| 2 | 3 | 1 | 1 | 0 |
| 2 | 3 | 1 | 1 | 0 |
| 2 | 3 | 1 | 1 | 0 |
| 2 | 3 | 1 | 1 | 0 |
| 2 | 3 | 1 | 1 | 0 |
| 2 | 3 | 1 | 1 | 0 |
| 2 | 3 | 1 | 1 | 0 |
| 2 | 3 | 1 | 1 | 1 |
| 2 | 3 | 1 | 1 | 1 |
| 2 | 3 | 1 | 1 | 1 |
| 2 | 3 | 1 | 1 | 1 |
| 2 | 3 | 1 | 1 | 1 |
| 2 | 3 | 1 | 1 | 1 |
| 2 | 3 | 1 | 2 | 0 |
| 2 | 3 | 1 | 2 | 0 |
| 2 | 3 | 1 | 2 | 0 |

[illegible]

[illegible]
