# Supplementary material for: The Importance of Demonstratively Restoring Order
Source: PubMed Central journal article supplement (PMC3673976; doi:10.1371/journal.pone.0065137), 2013-06-05
Supplement: pone.0065137.s004.pdf [file pone.0065137.s004.pdf]

## **Additional analyses Study 2**

*The percentage of individuals versus the percentage of groups that acted prosocial in the in the various conditions of Study 2:*

Condition 1 (subtle disrespect): individual (N=77) 6% vs groups (N=21) 5% ( $z=.293$ ,  $p=.769$  two-sided)

Condition 2 (subtle respect): individual (N=66) 20% vs groups (N=26) 27% ( $z=.756$ ,  $p=.449$  two-sided)

Condition 3 (moderate respect): individual (N=56) 34% vs groups (N=43) 35% ( $z=.100$ ,  $p=.921$  two-sided)

*The percentage of men versus the percentage of woman that acted prosocial in the in the various "individual" conditions of Study 2:*

Condition 1 (subtle disrespect): men (N=57) 7% vs women (N=20) 5% ( $z=.315$ ,  $p=.753$  two-sided)

Condition 2 (subtle respect): men (N=60) 20% vs women (N=6) 8% ( $z=.195$ ,  $p=.845$  two-sided)

Condition 3 (moderate respect): men (N=37) 38% vs women (N=19) 26% ( $z=.862$ ,  $p=.389$  two-sided)
