# Supplementary material for: The Importance of Demonstratively Restoring Order
Source: PubMed Central journal article supplement (PMC3673976; doi:10.1371/journal.pone.0065137), 2013-06-05
Supplement: pone.0065137.s005.pdf [file pone.0065137.s005.pdf]

### **Additional analyses Study 3**

*The percentage of men versus the percentage of woman that acted prosocial in the in the various conditions of Study 3:*

Condition 1 (subtle respect): men (N=28) 50% vs women (N=22) 27% ( $z=.1623$ ,  $p=.103$  two-sided)

Condition 2 (moderate respect): men (N=33) 58% vs women (N=23) 74% ( $z=1.255$ ,  $p=.209$  two-sided)

Condition 3 (intense respect): men (N=40) 80% vs women (N=21) 86% ( $z=.551$ ,  $p=.581$  two-sided)

*The percentage of observations that acted prosocial in the various conditions of Study 3, comparison of the observations, where confederate and participant differed vs not differed in gender:*

Condition 1 (subtle respect): no-gender difference (N=24) 25% vs gender difference (N=26) 54% ( $z=.2080$ ,  $p=.002$  one-sided)

Condition 2 (moderate respect): no-gender difference (N=27) 70% vs gender difference (N=29) 59% ( $z=.917$ ,  $p=.180$  one-sided)

Condition 3 (intense respect): no-gender difference (N=26) 77% vs gender difference (N=35) 86% ( $z=.883$ ,  $p=.189$  one-sided)
